# Supplementary material
Source: publisher site journal article supplement (https://www.dovepress.com/article/310698)
Supplement: Supplementary file 1 [file get_supplementary_file.php]

Name: Age: Sex: No.

Out/In-patient: Diagnosis; Tel:

Evaluator: Date:

### Pittsburgh Sleep Quality Index Scale (PSQI)

### The following questions relate to your usual sleep habits during the past month only. Your answers should indicate the most accurate reply for the majority of days and nights in the past month. Please answer all questions.

1. During the past month, when have you usually gone to bed at night? **USUAL BED TIME­­­_________**

**2.** During the past month, how long (in minutes) has it usually taken you to fall asleep each night? **NUMBER OF MINUTES__________**

3. During the past month, when have you usually gotten up in the morning?  **USUAL GETTING UP TIME___________**

**4.** During the past month, how many hours of actual sleep did you get at night? (This may be different than the number of hours you spend in bed.) **HOURS OF SLEEP PER NIGHT_________**

For each of the remaining questions, check the one best response. Please answer all questions.
5. During the past month, how often have you had trouble sleeping because you...
(a) Cannot get to sleep within 30 minutes (1) Not during the past month _ (2) Less than once a week_ (3) Once or twice a week _ (4) Three or more times a week _

(b) Wake up in the middle of the night or early morning (1) Not during the past month _ (2) Less than once a week_ (3) Once or twice a week _ (4) Three or more times a week _

(c) Have to get up to use the bathroom (1) Not during the past month _ (2) Less than once a week_ (3) Once or twice a week _ (4) Three or more times a week _

(d) Cannot breathe comfortably (1) Not during the past month _ (2) Less than once a week_ (3) Once or twice a week _ (4) Three or more times a week _

(e) Cough or snore loudly (1) Not during the past month _ (2) Less than once a week_ (3) Once or twice a week _ (4) Three or more times a week _

(f) Feel too cold (1) Not during the past month _ (2) Less than once a week_ (3) Once or twice a week _ (4) Three or more times a week _

(g) Feel too hot (1) Not during the past month _ (2) Less than once a week_ (3) Once or twice a week _ (4) Three or more times a week _

(h) Had bad dreams (1) Not during the past month _ (2) Less than once a week_ (3) Once or twice a week _ (4) Three or more times a week _

(i) Have pain (1) Not during the past month _ (2) Less than once a week_ (3) Once or twice a week _ (4) Three or more times a week _

(j)Other reason(s), please describe. How often during the past month have you had trouble sleeping because of this? (1) Not during the past month _ (2) Less than once a week_ (3) Once or twice a week _ (4) Three or more times a week _

6. During the past month, how would you rate your sleep quality overall? (1) Very good_ (2) Fairly good_ (3) Fairly bad_ (4) Very bad_

7. During the past month, how often have you taken medicine (prescribed or “over the counter”) to help you sleep?

(1) Not during the past month _ (2) Less than once a week_ (3) Once or twice a week _ (4) Three or more times a week _

8. During the past month, how often have you had trouble staying awake while driving, eating meals, or engaging in social activity?

(1) Not during the past month _ (2) Less than once a week_ (3) Once or twice a week _ (4) Three or more times a week _

9. During the past month, how much of a problem has it been for you to keep up enough enthusiasm to get things done?
(1) No problem at all _ (2) Only a very slight problem_ (3) Somewhat of a problem _ (4) A very big problem _

### Athens Insomnia Scale(AIS)

Instructions: This scale is intended to record your own assessment of any sleep difficulty you might have experienced. Please, check (by circling the appropriate number) the items below to indicate your estimate of any difficulty, provided that it occurred at least three times per week during the last month.

1.Sleep induction (time it takes you to fall asleep after turning-off the lights)

0: No problem 1: Slightly delayed 2: Markedly delayed 3: Very delayed or did not sleep at all

2.Awakenings during the night

0: No problem 1: Minor problem 2: Considerable problem 3: Serious problem or did not sleep at all

3.Final awakening earlier than desired

0: Not earlier 1: A little earlier 2: Markedly earlier 3: Much earlier or did not sleep at all

4.Total sleep duration

0: Sufficient 1: Slightly insufficient 2: Markedly insufficient 3: Very insufficient or did not sleep at all

5.Overall quality of sleep (no matter how long you slept)

0: Satisfactory 1: Slightly unsatisfactory 2: Markedly unsatisfactory 3: Very unsatisfactory or did not sleep at all

6.Sense of well-being during the day

0: Normal 1: Slightly decreased 2: Markedly decreased 3: Very decreased

7.Functioning (physical and mental) during the day

0: Normal 1: Slightly decreased 2: Markedly decreased 3: Very decreased

8.Sleepiness during the day

0: None 1: Mild 2: Considerable 3: Intense

### Hamilton Depression Rating Scale-17(HAMD-17)

1. Depressed Mood: (1) Only when asked say; (2) To express spontaneously in conversation; (3) Expression from the expression, posture, voice or desire to cry without words; (4) Emotion almost completely expressed from self-speech and non-verbal expression (expression, action).

2. Guilt: (1) Self-reproach, feels he has let people down; (2) Committed a crime, or thinks over his past faults and mistakes; (3) Present illness is a punishment or Delusions of guilt; (4) Hallucinations of guilt

3. Suicide: (1) Feels life is not worth living; (2) Wishes be dead or often think of things related to death; (3) Suicidal ideas; (4) Serious suicidal behavior

4. Insomnia, initial:（1）Difficulty in falling asleep sometimes, e.g. half an hour after going to bed still unable to fall asleep; (2) Difficulty in falling asleep every night.

5. Insomnia, middle: (1) Light sleep with more nightmares; (2) Wake up in the middle of the night (before 12 p.m.) (not including toilet use).

6. Insomnia, delayed: (1) Waking up early, one hour earlier than usual, but can fall asleep again; (2) Waking in early hours of the morning and unable to fall asleep again

7. Work and Interests: (1) Only when asked say; (2) To express loss of interest in activities, work or study, such as listlessness, indecision and vacillation, unable to insist or need to be forced to work or activities; (3) Less than 3 hours of labor or entertainment in the sick room; (4) Stopping work due to the current disease, the inpatient does not participate in any activities or cannot complete the daily work of the ward without the help of others.

8. Retardation: Slowness of thought, speech, and activity, Apathy, Stupor: (1) Slight retardation at interview; (2) Obvious retardation at interview; (3) Interview difficult; (4) Complete stupor

9. Agitation: Restlessness associated with anxiety: (1) Uneasiness during examination; (2) Restlessness or minor actions obvious; (3) Cannot sit still, had stood up during the examination; (4) Rub hands, bite fingers, pull hair, bite lips.

10. Anxiety, psychic: Tension and irritability, worrying about minor matters, apprehensive attitude, fears: (1) Only when asked say; (2) Express spontaneously; (3) Express and speak with obvious worry; (4) Scare obviously.

11. Anxiety, somatic: Gastrointestinal, wind, indigestion; cardiovascular, palpitations, headaches; respiratory, genito-urinary, etc. (1) Mild; (2) Moderate, with positive somatic anxiety symptom; (3) Severe, severe somatic anxiety symptoms, affect life or need to be treated; (4) Serious impact on life and activities.

12. Somatic Symptoms, Gastrointestinal: (1) Loss of appetite, but eat without encouragement; (2) Eating requires prodding or request from others, and laxatives or digestive drugs.

13. Somatic Symptoms, General: (1) Heaviness in limbs, back or neck, back pain, headache, muscle pain, general fatigue or fatigue; (2) The symptoms are obvious.

14. Genital Symptoms: Loss of libido, menstrual disturbances: (1) Mild; （2）Severe; (3) Not sure, or the item is not suitable for the evaluated (not included in the total score).

15. Hypochondriasis: (1) Self-absorption (bodily); (2) Preoccupation with health; (3) Hypochondriac delusion; (4) Hypochondriac delusions with hallucinations.

16. Loss of Weight: (1) Lose more than 1 jin in a week; (2) Lose more than 2 Jin in a week.

17. Insight: (0) No loss with depression show; (1) Partial or doubtful loss, due to poor food, environmental problems, too busy work, virus infection or need to rest; (3) Loss of insight with a complete denial.

**Hamilton Anxiety Scale-14(HAMA-14)**

HAMA score is 0~4. 5 Grades: 0 is none, **1** is mild, **2** is moderate, **3** is severe, **4** is very severe, grossly, disabling. HAMA has no work-related scoring criteria. The criteria for evaluating symptoms are as follows:

1．Anxious mood：Worries, anticipation of the worst, apprehension (fearful anticipation), irritability

2. Tension: Feelings of tension, fatiguability, inability to relax, startle response, moved to tears easily, trembling, feelings of restlessness

3. Fears: Of dark, strangers, being left alone, large animals, etc., traffic, crowds

4. Insomnia: Difficulty in falling asleep, broken sleep, dreams, nightmares, night terrors, unsatisfying sleep and fatigue on waking

5. Intellectual (cognitive): Difficulty in concentration, poor memory

6. Depressed mood: Loss of interest, lack of pleasure in hobbies, depression, early waking, diurnal swing

7. General somatic (muscular): Muscular pains and aches, muscular stiffness, muscular stiffness, muscular twitchings, clonic jerks, grinding of teeth, unsteady voice

8. General somatic (sensory): Tinnitus, blurring of vision, hot and cold flushes, feelings of weakness, pricking sensations

9. Cardiovascular symptoms: Tachycardia, palpitations, pain in chest, throbbing of vessels, fainting feelings, missing beat

10. Respiratory symptoms: Pressure or constriction in chest, choking feelings, sighings, dyspnoea

11. Gastro-intestinal symptoms: Difficulty in swallowing, wind, dyspepsia: pain before and after meals, burning sensations, fullness, waterbrash, nausea, vomiting, sinking feelings, ‘Working’ in abdomen, borborygmi, looseness of bowels, loss of weight, constipation

12. Genito-urinary symptoms: Frequency of micturition, urgency of micturition, amenorrhea, menorrhagia, development of frigidity, ejaculatio praecox, loss of erection, impotence

13. Autonomic symptoms: Dry mouth, flushing, pallor, tendency to sweat, giddiness, tension headache, raising of hair

14. Behaviour at interview: (1) General: Tense, not relaxed, fidgeting, hands, picking fingers, clenching, tics, handkerchief, restlessness: pacing, tremor of hands, furrowed brow, strained face, increased muscular tone, sighing respirations, facial pallor. (2) Behaviour (physiological): Swallowing, belching, high resting pulse rate, respiration rate over 20/min, brisk tendon jerks, tremor, dilated pupils, exophthalmos, sweating, eye-lid twitching
